# Supplementary material for: Gonadal transcriptomes associated with sex phenotypes provide potential male and female candidate genes of sex determination or early differentiation in Crassostrea gigas, a sequential hermaphrodite mollusc
Source: PubMed Central journal article supplement (PMC8353863; doi:10.1186/s12864-021-07838-1), 2021-08-09
Supplement: 12864_2021_7838_MOESM2_ESM.pdf [file 12864_2021_7838_MOESM2_ESM.pdf]

| <b>p-value Wilcoxon</b> | <b>Stage 0</b> | <b>Stage 1</b> | <b>Stage 2</b> | <b>Stage 3</b> |
|-------------------------|----------------|----------------|----------------|----------------|
| CGI 10011004            | 0.007898       | 0.000175       | 8.227e-05      | 8.227e-05      |
| CGI 10006800            | 0.000931       | 0.000175       | 0.001024       | 0.002165       |
| CGI 10016132            | 0.000631       | 0.000666       | 0.0004         | 0.02381        |
| CGI 10026009            | 4.114e-05      | 0.000626       | 0.00041        | 0.001773       |
| CGI 10018971            | 0.04009        | 0.000583       | 0.07487        | 0.01061        |
| CGI 10008094            | 0.03636        | 0.007898       | 0.0004         | 8.227e-05      |
| CGI 10025872            | 8.227e-05      | 4.114e-05      | 4.114e-05      | 0.00041        |
| CGI 10028666            | 0.000666       | 0.05556        | 0.07552        | 1.00           |
