# Supplementary material for: Gonadal transcriptomes associated with sex phenotypes provide potential male and female candidate genes of sex determination or early differentiation in Crassostrea gigas, a sequential hermaphrodite mollusc
Source: BMC Genomics. 2021 Aug 9;22:609. doi: 10.1186/s12864-021-07838-1 (PMC8353863; doi:10.1186/s12864-021-07838-1)
Supplement: Supplementary file 3 — Additional file 3. Primers used for RT-qPCR: list, sequences, number of bases, blasted name of the gene amplified, R2 and % of PCR efficiency. [file 12864_2021_7838_MOESM3_ESM.xlsx]

## Sheet: Feuil1
Name of primer	Sequence of primers (5’->3’)	Base number	Blasted gene name	R²	PCR efficiency (%)
EF1α_S	ACCACCCTGGTGAGATCAAG	20	Elongation Factor 1 α	0.996	107
EF1α_AS	ACGACGATCGCATTTCTCTT	20
CGI_10006800_S1_	GGT-CTA-TCT-TCG-CTG-GTT-GC	20	Trophoblast glycoprot-like	0.988	115
CGI_10006800_AS1_	AGC-AAA-TGC-ATG-TTG-ATG-GA	20
CGI_10016132_S2_	GGG-TCT-AAC-GGG-AAA-CCA-TT	20	Prot singed-like	0.987	93
CGI_10016132_AS2_	AAC-CAA-AGT-CAC-ACC-GGA-AG	20
CGI_10026009_S2	ACC-TCC-TAT-GCC-CAT-GAC-AG	20	Hypothetical prot	0.995	95
CGI_10026009_AS2_	ACC-ATT-GTC-GGG-CAT-TAT-GT	20
CGI_10018971_S1_	TGC-CAC-TGA-ACG-AGT-CTT-TG	20	Prot PML-like	0.977	118
CGI_10018971_AS1_	GGT-CCT-CTT-GCG-TTC-TTC-TG	20
CGI_10008094_S2_	CAT-GGC-ATT-CAA-AGG-GAG-AT	20	Gata prot 14-like	0.980	112
CGI_10008094_AS2	TTC-TCT-TTA-GTC-CGC-CTG-GA	20
CGI_10025872_S2_	CGA-CGG-AGA-ATC-CAG-GAC-TA	20	MAM et LDL-R prot-1 like	0.973	113
CGI_10025872_AS2_	CAA-GCG-GTT-GTA-AGG-TCC-AT	20
CGI_10028666_S2_	GAC-GAC-GGA-GAT-CGC-TAA-AG	20	Paramyosin	0.823	99
CGI_10028666_AS2_	TCT-GGA-ACT-GCG-TGA-GAT-TG	20
FoxL2_S	AAT-ATC-AGG-GAT-GGG-CAC-AA	20	FoxL2	0.996	102
FoxL2_AS	TCC-TTG-GGT-GCA-GGA-ACT-A	20
